# Supplementary material
Source: PubMed Central journal article supplement (PMC2000519)
Supplement: pnas_0707324104_1.pdf [file pnas_0707324104_1.pdf]

## Outer Helix

## P Helix

## Filter

## Inner Helix

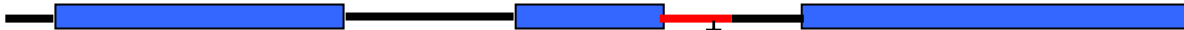

```
NaK_Bc : WKDKEFQVLFVLTILTLISGTIFYSTVEG-----LRPIDALYFSVVTLTTVGDGNFSPQTDFGKIIFTILYIFIGIGLVFGFIHKLAVNV
NaK_Ba : WKDKEFQVLFVLTFLTLMSGTIFYSTVEG-----LRPLDALYFSVVTLTTVGDANFSPQTDFGKIIFTILYIFIGIGLVFGFIHKLAVNV
bcNGA1 : IHWNACVYFSISKAIGFGNDTWVYPDVNDPDFGRLARKYVYSLYWSLTTLTTIGETPP-PVRDSEYFFVVAADFLLIGVLI FATIVGNIGSMI
hcNGA2 : IHWNACIYYAISKSIGFGVDTWVYPNITDPEYGYLAREYIYCLYWSLTTLTTIGETPP-PVKDEEYLFVIFDFLLIGVLI FATIVGNVGSMI
mCNGA3 : IHWNACIYFAISKFIFGTDSWVYPNTSKPEYARLSRKYIYSLYWSLTTLTTIGETPP-PVKDEEYLFVVIDFLVGI LI FATIVGNVGSMI
rCNGA4 : IHWNSCLYFALSRYLGFGRDWVYPDPAQPGFERLRQYLYSFYFSTLILT TVGDTPL-PDREEEYLFMVGDFLLAVMG FATIMGSMSSVI
Shaker : ASMRELGLLIFFLFIGVVLFS SAVYFAEAGSENSFFKSIPDAFWWAVVTMTTVGYGDMTPVGWVGKIVGSLCAIAGVLTIALPVPVIVSNF
KcsA : LHWRAAGAATVLLVIVLLAGSYLAVLAERGAPGAQLITYPRALWWSVETATTVGYGDLYPVT LWGRLVAVVVMVAGITSFGLVTAA LATWF
```
