# Supplementary material
Source: PubMed Central journal article supplement (PMC2000519)

$^{86}\text{Rb}$  Influx in the presence of externally added  $\text{Ca}^{2+}$

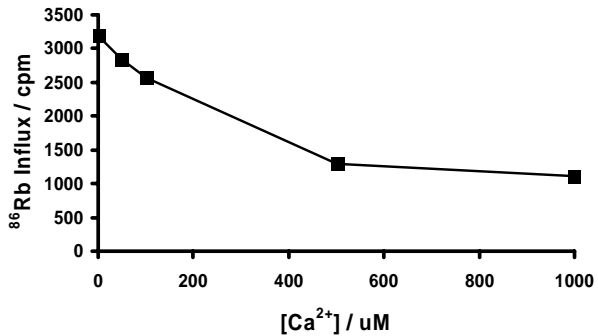

$^{86}\text{Rb}$  Influx in the presence of externally added  $\text{Ba}^{2+}$

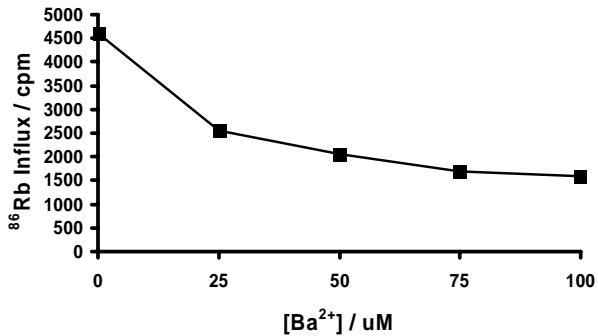

Supplement: pnas_0707324104_2.pdf [file pnas_0707324104_2.pdf]
