# Supplementary material
Source: PubMed Central journal article supplement (PMC2000519)

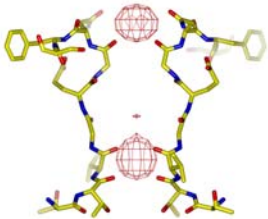

**Ba**

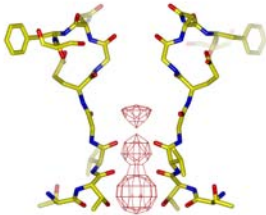

**Rb**

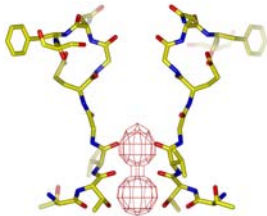

**Cs**

Supplement: pnas_0707324104_3.pdf [file pnas_0707324104_3.pdf]

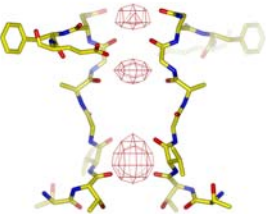

**Ba**

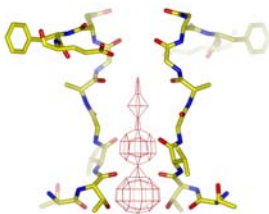

**Rb**

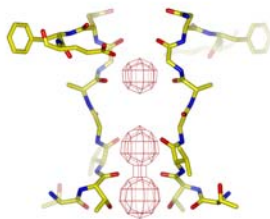

**Cs**

Supplement: pnas_0707324104_4.pdf [file pnas_0707324104_4.pdf]
